# Supplementary material
Source: Springer Nature journal article supplement (https://www.springermedizin.de/resource/supplementary/13011_2007_76_MOESM2_ESM.pdf/9628392)

**% sensitivity and specificity at CO cut off**

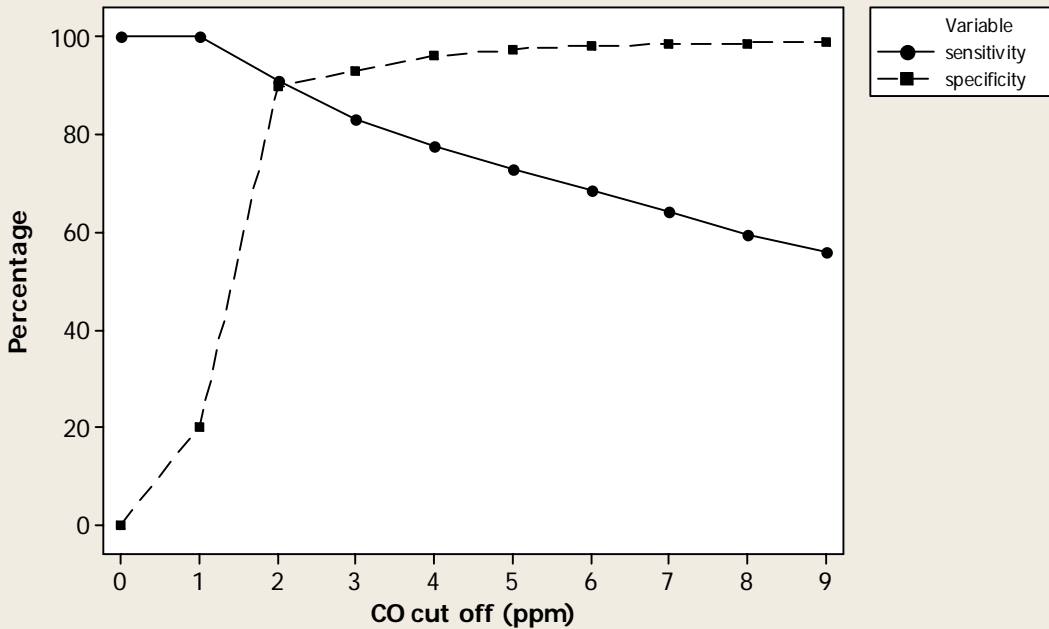

Supplement: MOESM2 [file 9628392]
